# Supplementary material for: Genetic diversity of Ethiopian durum wheat landraces
Source: PLoS One. 2021 Feb 17;16(2):e0247016. doi: 10.1371/journal.pone.0247016 (PMC7888639; doi:10.1371/journal.pone.0247016)
Supplement: S1 Table — n = 285 with Delta K at k = 2 and ETDWL, n = 215 with Delta K at k = 4. (XLSX) [file pone.0247016.s001.xlsx]

## Sheet: S1 Table 
S1 Table. Population STRUCTURE analysis results for SP, n = 285 with Delta K at k = 2 and ETDWL, n = 215 with Delta K at k = 4.
SP: Study panel, ETDWL: Ethiopian durum wheat landrace.
Column under population shows sturucture analyses based colors designated for the identifed population in SP and in ETDWL by number after hypane.
Acc. No	Geno code	Seed origin	Seed collection zone	Type	Altitude meter above sea level	population
231584	DW208	Amhara	NORTH WELLO	Landrace	2920	Pop1-1
8333-1	DW003-1	Amhara	EAST GOJAM	Landrace	2580	Pop1-1
204560-2	DW029-2	Oromia	NORTH SHEWA	Landrace	2501	Pop1-1
208261	DW094	Oromia	ARSI	Landrace	2420	Pop1-1
208931	DW035	Oromia	WEST SHEWA	Landrace	2400	Pop1-1
204560-1	DW029-1	Oromia	NORTH SHEWA	Landrace	2500	Pop1-1
222299	DW069	Oromia	BALE	Landrace	2545	Pop1-1
222372	DW080	Oromia	ARSI	Landrace	2040	Pop1-1
214307	DW038	Oromia	EAST SHEWA	Landrace	2680	Pop1-1
222462-2	DW097-2	Oromia	WEST SHEWA	Landrace	2601	Pop1-1
214587	DW059	Oromia	MISRAK WELLEGA	Landrace	2340	Pop1-1
231524	DW199	Oromia	WEST SHEWA	Landrace	2830	Pop1-1
8333-2	DW003-2	Amhara	EAST GOJAM	Landrace	2581	Pop1-1
231613	DW225	Oromia	EAST HARERGE	Landrace	2510	Pop1-1
204564	DW032	Oromia	NORTH SHEWA	Landrace	2500	Pop1-1
231588	DW212	Amhara	NORTH WELLO	Landrace	2820	Pop1-1
231597	DW219	Amhara	SOUTH WELLO	Landrace	2600	Pop1-1
231589-1	DW213-1	Amhara	NORTH WELLO	Landrace	2890	Pop1-1
238134	DW256	Tigray	EAST AWI	Landrace	2600	Pop1-1
222684-2	DW124-2	Amhara	NORTH WELLO	Landrace	2841	Pop1-1
231599	DW220	Amhara	SOUTH WELLO	Landrace	2600	Pop1-1
238135	DW257	Tigray	EAST AWI	Landrace	2470	Pop1-1
203996	DW011	Amhara	NORTH SHEWA	Landrace	3060	Pop1-1
226207	DW131	Amhara	NORTH GONDAR	Landrace	2100	Pop1-1
226963	DW184	Oromia	EAST SHEWA	Landrace	2200	Pop1-1
222352	DW072	Amhara	WEST GOJAM	Landrace	2560	Pop1-1
212564	DW037	Amhara	NORTH SHEWA	Landrace	2640	Pop1-1
226922	DW176	SNNP	NORTH OMO	Landrace	2350	Pop1-1
216072	DW064	Oromia	ARSI	Landrace	2800	Pop1-1
222732	DW126	Amhara	NORTH SHEWA	Landrace	2740	Pop1-1
231589-2	DW213-2	Amhara	NORTH WELLO	Landrace	2891	Pop1-1
226903	DW174	Oromia	NORTH SHEWA	Landrace	2510	Pop1-1
8175	DW141	SNNP	KEMBATA ALABANA TEMB	Landrace	2780	Pop1-1
204483	DW019	Oromia	NORTH SHEWA	Landrace	2880	Pop1-1
204562	DW030	Oromia	NORTH SHEWA	Landrace	2500	Pop1-1
212561-1	DW036	Amhara	NORTH SHEWA	Landrace	2680	Pop1-1
212561-2	DW036-2	Amhara	NORTH SHEWA	Landrace	2681	Pop1-1
215276	DW063	Amhara	NORTH SHEWA	Landrace	2920	Pop1-1
222619	DW114	Amhara	SOUTH GONDAR	Landrace	3040	Pop1-1
226245	DW133	Tigray	SOUTH AWI	Landrace	2687	Pop1-1
226830	DW159	Amhara	EAST GOJAM	Landrace	2480	Pop1-1
231536-1	DW200-1	Amhara	NORTH SHEWA	Landrace	3010	Pop1-1
231585	DW209	Amhara	NORTH WELLO	Landrace	2920	Pop1-1
231594	DW217	Amhara	NORTH WELLO	Landrace	2780	Pop1-1
238127	DW251	Tigray	EAST AWI	Landrace	2930	Pop1-1
226834-1	DW160-1	Amhara	EAST GOJAM	Landrace	2460	Pop1-2
204555	DW028	Oromia	NORTH SHEWA	Landrace	2500	Pop1-2
204544	DW027	Oromia	NORTH SHEWA	Landrace	2600	Pop1-2
222708	DW125	Oromia	EAST HARERGE	Landrace	2380	Pop1-2
222431	DW091	Oromia	ARSI	Landrace	2460	Pop1-2
236984	DW232	Oromia	ARSI	Landrace	1995	Pop1-2
214315	DW216	Amhara	NORTH WELLO	Landrace	2780	Pop1-2
214518	DW052	Amhara	EAST GOJAM	Landrace	2660	Pop1-2
222358	DW073	Amhara	EAST GOJAM	Landrace	2560	Pop1-2
226837	DW161	Amhara	EAST GOJAM	Landrace	2510	Pop1-2
226352	DW144	Oromia	ARSI	Landrace	2400	Pop1-2
222462-1	DW097-1	Oromia	WEST SHEWA	Landrace	2600	Pop1-2
222426	DW090	Oromia	ARSI	Landrace	2460	Pop1-2
214352	DW041	Oromia	WEST SHEWA	Landrace	2810	Pop1-2
226819	DW158	Oromia	BALE	Landrace	2600	Pop1-2
226327	DW138	SNNP	HADIYA	Landrace	2590	Pop1-2
222568	DW108	Oromia	WEST HARERGE	Landrace	2030	Pop1-2
231536-2	DW200-2	Amhara	NORTH SHEWA	Landrace	3011	Pop1-2
214366	DW044	Amhara	NORTH SHEWA	Landrace	3000	Pop1-2
222632	DW117	Amhara	SOUTH GONDAR	Landrace	2850	Pop1-2
204563	DW031	Oromia	NORTH SHEWA	Landrace	2500	Pop1-2
222360	DW075	Amhara	EAST GOJAM	Landrace	2550	Pop1-2
208293-1	DW142-2	Oromia	DZARC	Landrace	NA	Pop1-2
222413	DW086	Oromia	ARSI	Landrace	2430	Pop1-2
226838-2	DW162-2	Amhara	EAST GOJAM	Landrace	2510	Pop1-2
231586	DW210	Amhara	NORTH WELLO	Landrace	2820	Pop1-2
236986	DW234	Amhara	NORTH SHEWA	Landrace	2010	Pop1-2
204488-1	DW022-1	Oromia	NORTH SHEWA	Landrace	2850	Pop1-3
222382	DW081	Oromia	ARSI	Landrace	2930	Pop1-3
222404	DW084	Oromia	ARSI	Landrace	2650	Pop1-3
222191	DW065	Oromia	EAST SHEWA	Landrace	2300	Pop1-3
231540	DW202	Amhara	NORTH SHEWA	Landrace	3190	Pop1-3
236981	DW230	Oromia	ARSI	Landrace	2150	Pop1-3
223257	DW128	Tigray	SOUTH AWI	Landrace	2600	Pop1-3
231541	DW203	Amhara	NORTH SHEWA	Landrace	3190	Pop1-3
226838-1	DW162-1	Amhara	EAST GOJAM	Landrace	2510	Pop1-3
222684-1	DW124-1	Amhara	NORTH WELLO	Landrace	2840	Pop1-3
214557	DW054	Amhara	SOUTH WELLO	Landrace	2450	Pop1-3
226881	DW167	Oromia	WEST SHEWA	Landrace	2850	Pop1-3
204488-2	DW023-2	Oromia	NORTH SHEWA	Landrace	2851	Pop1-3
222415	DW087	Oromia	ARSI	Landrace	2400	Pop1-3
222198	DW066	Oromia	ARSI	Landrace	2520	Pop1-3
222387	DW082	Oromia	ARSI	Landrace	2490	Pop1-3
236985	DW233	Oromia	ARSI	Landrace	2000	Pop1-3
222408	DW085	Oromia	ARSI	Landrace	2490	Pop1-3
222418	DW088	Oromia	ARSI	Landrace	2400	Pop1-3
226357	DW147	Oromia	ARSI	Landrace	2440	Pop1-3
222465	DW098	Oromia	WEST SHEWA	Landrace	2600	Pop1-3
222469	DW099	Oromia	WEST SHEWA	Landrace	2490	Pop1-3
15359	DW009	Oromia	EAST SHEWA	Landrace	2372	Pop1-3
208152	DW026	Oromia	NORTH SHEWA	Landrace	2710	Pop1-3
222421	DW089	Oromia	ARSI	Landrace	2415	Pop1-3
231569	DW205	SNNP	KEMBATA ALABANA TEMB	Landrace	2540	Pop1-3
226886	DW171	Oromia	WEST SHEWA	Landrace	2850	Pop1-3
222346	DW071	Amhara	AGEW AWI	Landrace	2540	Pop1-3
231547	DW204	Oromia	ARSI	Landrace	2400	Pop1-3
226209	DW132	Amhara	SOUTH GONDAR	Landrace	2700	Pop1-3
222533	DW105	Amhara	NORTH GONDAR	Landrace	2004	Pop1-3
226301	DW135	Oromia	WEST SHEWA	Landrace	2590	Pop1-3
204470	DW017	Oromia	ARSI	Landrace	2520	Pop1-3
226840	DW163	Amhara	EAST GOJAM	Landrace	2550	Pop1-3
222608-2	DW112-2	Amhara	SOUTH GONDAR	Landrace	3051	Pop1-3
204417	DW016	Oromia	ARSI	Landrace	2730	Pop1-3
204392	DW013	Oromia	ARSI	Landrace	2440	Pop1-3
222508	DW101	Amhara	NORTH GONDAR	Landrace	2550	Pop1-3
226356	DW146	Oromia	ARSI	Landrace	2440	Pop1-3
226888	DW173	Amhara	NORTH SHEWA	Landrace	2720	Pop1-3
226958	DW180	Amhara	NORTH GONDAR	Landrace	2927	Pop1-3
226978	DW189	Oromia	ARSI	Landrace	2420	Pop1-3
203724	DW194	Oromia	ARSI	Landrace	2520	Pop1-3
231573	DW207	Amhara	EAST GOJAM	Landrace	2510	Pop1-3
236974-1	DW227-1	Oromia	ARSI	Landrace	2850	Pop1-3
5739-1	DW258	Tigray	MEHAKELEGNAW	Landrace	NA	Pop1-3
238138	DW259	Tigray	MEHAKELEGNAW	Landrace	2180	Pop1-3
222362	DW076	Amhara	EAST GOJAM	Landrace	2510	Pop1-4
226876	DW166	Oromia	WEST SHEWA	Landrace	2880	Pop1-4
238123	DW247	Tigray	MEHAKELEGNAW	Landrace	2000	Pop1-4
238120	DW244	Tigray	MEHAKELEGNAW	Landrace	2030	Pop1-4
238121	DW245	Tigray	MEHAKELEGNAW	Landrace	1850	Pop1-4
238139	DW260	Amhara	EAST GOJAM	Landrace	2440	Pop1-4
204493-1	DW023-1	Oromia	NORTH SHEWA	Landrace	2850	Pop1-4
222433	DW093	Oromia	ARSI	Landrace	2420	Pop1-4
8436	DW005	SNNP	BENCH MAJI	Landrace	1820	Pop1-4
214333	DW040	Oromia	NORTH SHEWA	Landrace	2510	Pop1-4
222432	DW092	Oromia	ARSI	Landrace	2460	Pop1-4
204485	DW021	Oromia	NORTH SHEWA	Landrace	2880	Pop1-4
222298	DW068	Oromia	BALE	Landrace	2545	Pop1-4
226971-2	DW186-2	Oromia	ARSI	Landrace	2441	Pop1-4
238119	DW243	Tigray	MEHAKELEGNAW	Landrace	2000	Pop1-4
238128	DW252	Tigray	EAST AWI	Landrace	2990	Pop1-4
204566	DW033	Oromia	EAST SHEWA	Landrace	2350	Pop1-4
204573-1	DW034-1	Oromia	EAST SHEWA	Landrace	2490	Pop1-4
238132	DW254	Tigray	EAST AWI	Landrace	2600	Pop1-4
226381	DW148	Oromia	NORTH SHEWA	Landrace	2598	Pop1-4
236987	DW235	Amhara	NORTH SHEWA	Landrace	2019	Pop1-4
222574	DW109	Oromia	EAST HARERGE	Landrace	2260	Pop1-4
214356	DW043	Oromia	NORTH SHEWA	Landrace	2650	Pop1-4
222644	DW121	Amhara	SOUTH GONDAR (BG)	Landrace	2980	Pop1-4
226393	DW153	Oromia	EAST SHEWA	Landrace	2160	Pop1-4
238124	DW248	Tigray	MEHAKELEGNAW	Landrace	2000	Pop1-4
208271	DW074	Amhara	EAST GOJAM	Landrace	2550	Pop1-4
226882	DW168	Oromia	WEST SHEWA	Landrace	2850	Pop1-4
231538	DW201	Oromia	ARSI	Landrace	2750	Pop1-4
231610	DW224	Oromia	EAST HARERGE	Landrace	2630	Pop1-4
7961	DW002	Amhara	NORTH SHEWA	Landrace	2600	Pop1-4
222639	DW119	Amhara	SOUTH GONDAR	Landrace	2680	Pop1-4
231597-1	DW219-1	Amhara	SOUTH WELLO	Landrace	2601	Pop1-4
226331	DW139	Amhara	NORTH SHEWA	Landrace	2835	Pop1-4
226914	DW175	Amhara	AGEW AWI	Landrace	2510	Pop1-4
231592-1	DW215-1	Amhara	NORTH WELLO	Landrace	2260	Pop1-4
7960	DW001	Amhara	NORTH SHEWA	Landrace	2600	Pop1-4
8356	DW004	Amhara	EAST GOJAM	Landrace	2150	Pop1-4
222435	DW095	Oromia	ARSI	Landrace	2420	Pop1-4
222554	DW106	Oromia	ARSI	Landrace	2465	Pop1-4
214353	DW042	Oromia	WEST SHEWA	Landrace	2810	Pop1-4
222530	DW104	Amhara	NORTH GONDAR	Landrace	2510	Pop1-4
236988	DW236	Oromia	EAST SHEWA	Landrace	2200	Pop1-4
214517	DW051	Amhara	EAST GOJAM	Landrace	2580	Pop1-4
7148	DW127	Oromia	BALE	Landrace	1760	Pop1-4
203776	DW010	Amhara	NORTH GONDAR	Landrace	2100	Pop1-4
214591	DW061	Amhara	SOUTH WELLO	Landrace	2600	Pop1-4
222608-1	DW112-1	Amhara	SOUTH GONDAR	Landrace	3050	Pop1-4
226809	DW157	Amhara	NORTH GONDAR	Landrace	2840	Pop1-4
227007	DW190	Amhara	EAST GOJAM	Landrace	2502	Pop1-4
222600	DW111	Amhara	SOUTH GONDAR	Landrace	3000	Pop1-4
238117	DW241	Tigray	MEHAKELEGNAW	Landrace	1920	Pop1-4
231499	DW198	Oromia	NORTH SHEWA	Landrace	2853	Pop1-4
222370	DW206	Amhara	EAST GOJAM	Landrace	2390	Pop1-4
226312-1	DW137-1	Amhara	NORTH SHEWA	Landrace	2860	Pop1-4
227008	DW191	Amhara	EAST GOJAM	Landrace	2502	Pop1-4
227009	DW192	Oromia	ARSI	Landrace	2995	Pop1-4
7217	DW197	Oromia	ARSI	Landrace	1540	Pop1-4
214377	DW046	Oromia	WEST SHEWA	Landrace	2210	Pop1-4
227016	DW195	Oromia	WEST SHEWA	Landrace	2635	Pop1-4
222613	DW113	Amhara	SOUTH GONDAR	Landrace	3130	Pop1-4
20666-1	DW014	Oromia	DZARC	Landrace	NA	Pop1-4
222629	DW116	Amhara	SOUTH GONDAR	Landrace	2850	Pop1-4
226808	DW156	Amhara	NORTH GONDAR	Landrace	2840	Pop1-4
214497	DW048	Oromia	ARSI	Landrace	2720	Pop1-4
208332-2	DW045	Amhara	NORTH SHEWA	Landrace	2841	Pop1-4
204349	DW012	Oromia	BALE	Landrace	2560	Pop1-4
222578	DW110	Oromia	EAST HARERGE	Landrace	2410	Pop1-4
226971-1	DW186-1	Oromia	ARSI	Landrace	2440	Pop1-4
204411	DW015	Oromia	ARSI	Landrace	2275	Pop1-4
204482	DW018	Oromia	NORTH SHEWA	Landrace	2890	Pop1-4
214490	DW047	Amhara	NORTH GONDAR	Landrace	2720	Pop1-4
214515	DW049	Amhara	EAST GOJAM	Landrace	2560	Pop1-4
7208	DW055	Amhara	EAST GOJAM	Landrace	2200	Pop1-4
214571	DW056	Amhara	EAST GOJAM	Landrace	2200	Pop1-4
222503	DW100	Amhara	NORTH GONDAR	Landrace	2400	Pop1-4
222514	DW102	Amhara	NORTH GONDAR	Landrace	2660	Pop1-4
222627	DW115	Amhara	SOUTH GONDAR	Landrace	2850	Pop1-4
226093	DW129	Amhara	SOUTH WELLO	Landrace	2570	Pop1-4
226342	DW140	Oromia	EAST SHEWA	Landrace	2755	Pop1-4
226354-1	DW145-1	Oromia	ARSI	Landrace	2400	Pop1-4
226807	DW155	Amhara	NORTH GONDAR	Landrace	2840	Pop1-4
226834	DW160	Amhara	EAST GOJAM	Landrace	2460	Pop1-4
226844	DW164	Amhara	EAST GOJAM	Landrace	2580	Pop1-4
216648	DW177	Oromia	ARSI	Landrace	2570	Pop1-4
214537-1	DW214-1	Amhara	NORTH WELLO	Landrace	2260	Pop1-4
238122	DW246	Tigray	MEHAKELEGNAW	Landrace	1750	Pop1-4
214308	DW039	Oromia	EAST SHEWA	Landrace	2680	Pop2-4
15356	DW006	Oromia	EAST SHEWA	Landrace	2300	Pop2-4
15357	DW007	Oromia	EAST SHEWA	Landrace	2326	Pop2-4
204484	DW020	Oromia	NORTH SHEWA	Landrace	2880	Pop2-4
222735	DW050	Amhara	EAST GOJAM	Landrace	2560	Pop2-4
208180	DW188	Oromia	ARSI	Landrace	2420	Pop2-4
15358	DW008	Oromia	EAST SHEWA	Landrace	2310	Pop2-4
226351	DW143	Oromia	ARSI	Landrace	2800	Pop2-4
208746-2-2	DW185	Oromia	ARSI	Landrace	2780	Pop2-4
DZ005	DZ005	DZARC	DZARC	Advanced	NA	Pop2
Salam	Selam	DZARC	DZARC	Released	NA	Pop2
DZ008	DZ008	DZARC	DZARC	Advanced	NA	Pop2
DZ009	DZ009	DZARC	DZARC	Advanced	NA	Pop2
Top-66	Top-66	DZARC	DZARC	Released	NA	Pop2
DZ006	DZ006	DZARC	DZARC	Advanced	NA	Pop2
Metaya	Metaya	DZARC	DZARC	Released	NA	Pop2
Megnagna	Megnagna	DZARC	DZARC	Released	NA	Pop2
Werer	Werer	DZARC	DZARC	Released	NA	Pop2
DZ004	DZ004	DZARC	DZARC	Advanced	NA	Pop2
DZ010	DZ010	DZARC	DZARC	Released	NA	Pop2
Quami	Quamy	DZARC	DZARC	Released	NA	Pop2
Yerer	Yerer	DZARC	DZARC	Released	NA	Pop2
DZ003	DZ003	DZARC	DZARC	Advanced	NA	Pop2
Ude	Ude	DZARC	DZARC	Released	NA	Pop2
DZ001	DZ001	DZARC	DZARC	Advanced	NA	Pop2
Mosobo	Mosobo	DZARC	DZARC	Released	NA	Pop2
Asasa	Asasa	DZARC	DZARC	Released	NA	Pop2
DZ002	DZ002	DZARC	DZARC	Advanced	NA	Pop2
DZ007	DZ007	DZARC	DZARC	Advanced	NA	Pop2
521610	C001	CIMMYT	CIMMYT	CIMMYT	NA	Pop2
521637	C002	CIMMYT	CIMMYT	CIMMYT	NA	Pop2
537861	C003	CIMMYT	CIMMYT	CIMMYT	NA	Pop2
547732	C004	CIMMYT	CIMMYT	CIMMYT	NA	Pop2
547734	C005	CIMMYT	CIMMYT	CIMMYT	NA	Pop2
547919	C006	CIMMYT	CIMMYT	CIMMYT	NA	Pop2
547944	C007	CIMMYT	CIMMYT	CIMMYT	NA	Pop2
547944	C008	CIMMYT	CIMMYT	CIMMYT	NA	Pop2
547949	C009	CIMMYT	CIMMYT	CIMMYT	NA	Pop2
547973	C010	CIMMYT	CIMMYT	CIMMYT	NA	Pop2
548022	C011	CIMMYT	CIMMYT	CIMMYT	NA	Pop2
548091	C012	CIMMYT	CIMMYT	CIMMYT	NA	Pop2
548465	C013	CIMMYT	CIMMYT	CIMMYT	NA	Pop2
548474	C014	CIMMYT	CIMMYT	CIMMYT	NA	Pop2
548636	C015	CIMMYT	CIMMYT	CIMMYT	NA	Pop2
548642	C016	CIMMYT	CIMMYT	CIMMYT	NA	Pop2
548644	C017	CIMMYT	CIMMYT	CIMMYT	NA	Pop2
527306	C018	CIMMYT	CIMMYT	CIMMYT	NA	Pop2
521278	C019	CIMMYT	CIMMYT	CIMMYT	NA	Pop2
537883	C020	CIMMYT	CIMMYT	CIMMYT	NA	Pop2
537883	C021	CIMMYT	CIMMYT	CIMMYT	NA	Pop2
537893	C022	CIMMYT	CIMMYT	CIMMYT	NA	Pop2
538013	C023	CIMMYT	CIMMYT	CIMMYT	NA	Pop2
538044	C024	CIMMYT	CIMMYT	CIMMYT	NA	Pop2
538123	C025	CIMMYT	CIMMYT	CIMMYT	NA	Pop2
531727	C026	CIMMYT	CIMMYT	CIMMYT	NA	Pop2
531800	C027	CIMMYT	CIMMYT	CIMMYT	NA	Pop2
531517	C028	CIMMYT	CIMMYT	CIMMYT	NA	Pop2
547914	C029	CIMMYT	CIMMYT	CIMMYT	NA	Pop2
547919	C030	CIMMYT	CIMMYT	CIMMYT	NA	Pop2
547963	C031	CIMMYT	CIMMYT	CIMMYT	NA	Pop2
547973	C032	CIMMYT	CIMMYT	CIMMYT	NA	Pop2
547988	C033	CIMMYT	CIMMYT	CIMMYT	NA	Pop2
547989	C034	CIMMYT	CIMMYT	CIMMYT	NA	Pop2
547989	C035	CIMMYT	CIMMYT	CIMMYT	NA	Pop2
548017	C036	CIMMYT	CIMMYT	CIMMYT	NA	Pop2
548030	C037	CIMMYT	CIMMYT	CIMMYT	NA	Pop2
548030	C038	CIMMYT	CIMMYT	CIMMYT	NA	Pop2
548097	C039	CIMMYT	CIMMYT	CIMMYT	NA	Pop2
548462	C040	CIMMYT	CIMMYT	CIMMYT	NA	Pop2
548465	C041	CIMMYT	CIMMYT	CIMMYT	NA	Pop2
548605	C042	CIMMYT	CIMMYT	CIMMYT	NA	Pop2
548605	C043	CIMMYT	CIMMYT	CIMMYT	NA	Pop2
548633	C044	CIMMYT	CIMMYT	CIMMYT	NA	Pop2
548642	C045	CIMMYT	CIMMYT	CIMMYT	NA	Pop2
548667	C046	CIMMYT	CIMMYT	CIMMYT	NA	Pop2
548690	C047	CIMMYT	CIMMYT	CIMMYT	NA	Pop2
548699	C048	CIMMYT	CIMMYT	CIMMYT	NA	Pop2
548152	C049	CIMMYT	CIMMYT	CIMMYT	NA	Pop2
541942	C050	CIMMYT	CIMMYT	CIMMYT	NA	Pop2
Acc. No: Accession number, Geno-code: Genome code, DW: Durum wheat, C: CIMMYT (Centro Internacional de Mejoramiento de Maíz y Trigo ), DZARC: Debre Zeit Agricultural Research Center, DZ: Debre Zeit, SNNP: South Nation Nationalities and Peoples. Names under Acc.No are released durum varieties in Ethiopia
